# Supplementary material
Source: publisher figshare collection journal article supplement (https://diabetesjournals.figshare.com/ndownloader/files/22522217)
Supplement: Supplementary file 1 [file 22522217]

**Online Supplemental Material**

Table of Contents

[The International Diabetes Closed Loop (iDCL) Trial Study Group (site investigators noted): 2](#_Toc37411672)

[Supplemental Figure S1. Enrollment, Randomization, Treatment Received, Follow Up 4](#_Toc37411673)

[Supplemental Figure S2. TIR Scatterplot of last 13 weeks of Preceding RCT vs. 13 weeks of Randomized by Treatment Group 5](#_Toc37411674)

[Supplemental Figure S3. TIR Scatterplot of last 13 weeks of Preceding RCT vs. 13 weeks of Randomized by Treatment Group – Excluding Periods of Study-wide Suspension of Device Use 6](#_Toc37411675)

[Supplemental Table S1A: CGM-Measured Outcomes during Daytime (6am-12mn) 7](#_Toc37411676)

[Supplemental Table S1B: CGM-Measured Outcomes during Nighttime (12mn – 6am) 9](#_Toc37411677)

[Supplemental Table S2: Subgroup Analysis for Outcomes of CGM-Measured Percent Time in Range 70-180 mg/dL 11](#_Toc37411678)

[Supplemental Table S3: HbA1c Results 13](#_Toc37411679)

[Supplemental Table S4: Insulin, Weight, and Body Mass Index 14](#_Toc37411680)

[Supplemental Table S5: Safety Outcomes 15](#_Toc37411681)

# The International Diabetes Closed Loop (iDCL) Trial Study Group (site investigators noted):

**University of Virginia, Center for Diabetes Technology, Charlottesville, VA:** Sue Brown (PI), Boris Kovatchev (Grant PI), Stacey Anderson (PI), Emma Emory, Mary Voelmle, Katie Conshafter, Kim Morris, Mary Oliveri, Linda Gondor-Fredrick, Harry Mitchell, Kayla Calvo, Christian Wakeman, Marc Breton

**Joslin Diabetes Center, Harvard Medical School, Boston, MA**: Lori Laffel (PI), Elvira Isganaitis (I), Louise Ambler-Osborn (I), Emily Flint, Kenny Kim, Lindsay Roethke

**Sansum Diabetes Research Institute, Santa Barbara, CA**: Jordan Pinsker (PI), Mei Mei Church (I), Camille Andre, Molly Piper

**Division of Endocrinology, Diabetes, Icahn School of Medicine at Mount Sinai, New York City, NY**: Carol Levy (PI), David Lam (I), Grenye O’Malley (I), Camilla Levister (I), Selassie Ogyaadu, Jessica Lovett

**Division of Endocrinology, Diabetes, Metabolism, and Nutrition, Department of Internal Medicine, Mayo Clinic, Rochester MN**: Yogish C. Kudva (PI), Vinaya Simha (I), Vikash Dadlani, Shelly McCrady-Spitzer, Corey Reid, Kanchan Kumari

**Barbara Davis Center for Diabetes, University of Colorado, Anschutz Medical Campus, Aurora, CO**: R. Paul Wadwa (PI), Greg Forlenza (I), G. Todd Alonso (I), Robert Slover (I), Emily Jost, Laurel Messer, Cari Berget, Lindsey Towers, Alex Rossick-Solis

**Department of Pediatrics, Division of Pediatric Endocrinology and Diabetes, Stanford University School of Medicine**: Bruce Buckingham (PI), Laya Ekhlaspour (I), Tali Jacobson, Marissa Town, Ideen Tabatabai, Jordan Keller, Evalina Salas

**John A. Paulson School of Engineering and Applied Sciences, Harvard University, Cambridge, MA:** Francis Doyle III, Eyal Dassau

**Jaeb Center for Health Research**: John Lum, Roy Beck, Samantha Passman, Tiffany Campos, Dan Raghinaru, Craig Kollman, Carlos Murphy, Nandan Patibandla, Sarah Borgman

**National Institute of Diabetes, Digestive, and Kidney Diseases (NIDDK):** Guillermo Arreza-Rubin (Project Scientist), Thomas Eggerman (Program Officer), Neal Green

**iDCL Steering Committee Members:** Boris Kovatchev, Sue Brown, Stacey Anderson, Marc Breton, Lori Laffel, Jordan Pinsker, Carol Levy, Yogish C. Kudva, R. Paul Wadwa, Bruce Buckingham, Francis Doyle III, Eric Renard, Claudio Cobelli, Yves Reznik, Guillermo Arreza-Rubin, John Lum, Roy Beck

**Central Laboratory - University of Minnesota Advanced Research and Diagnostic Laboratory:** Robert Janicek, Deanna Gabrielson

**Data Safety Monitoring Board (DSMB)**: Steven H. Belle (Chair), Jessica Castle; Jennifer Green, Laurent Legault, Steven M. Willi, Carol Wysham, Thomas Eggerman (DSMB Executive Secretary for NIDDK)

# Supplemental Figure S1. Enrollment, Randomization, Treatment Received, Follow Up


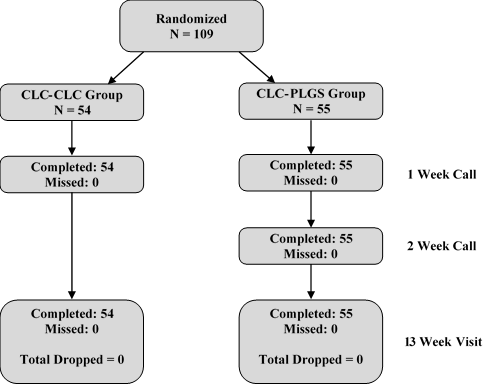


# Supplemental Figure S2. TIR Scatterplot of last 13 weeks of Preceding RCT vs. 13 weeks of Randomized by Treatment Group


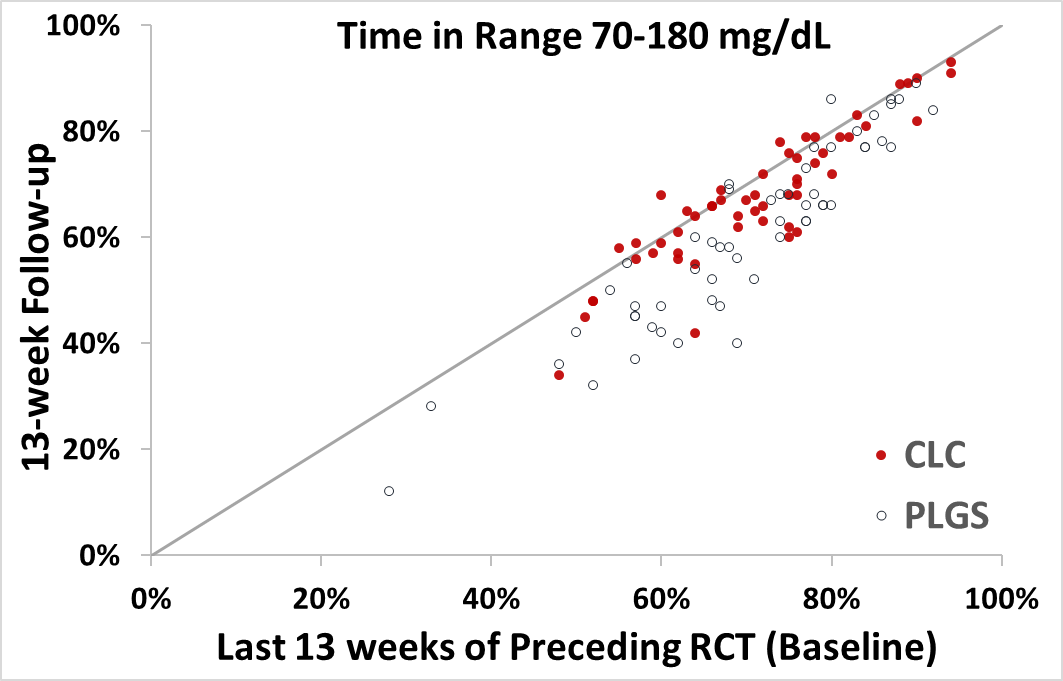


# Supplemental Figure S3. TIR Scatterplot of last 13 weeks of Preceding RCT vs. 13 weeks of Randomized by Treatment Group – Excluding Periods of Study-wide Suspension of Device Use


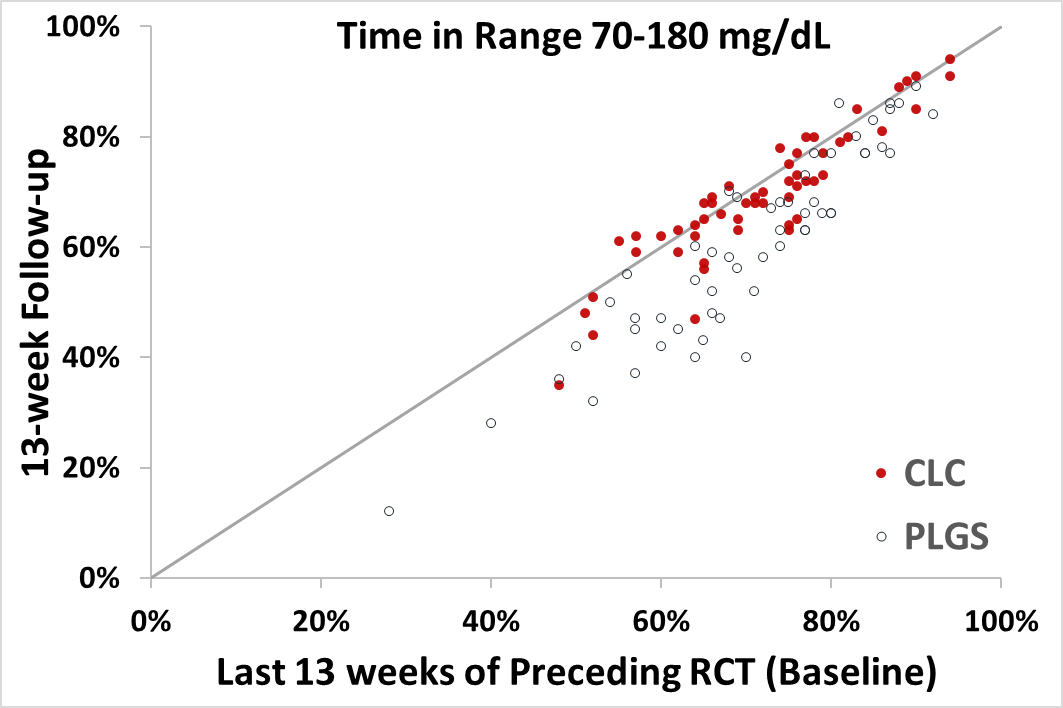


**Supplemental Table S1A: CGM-Measured Outcomes during Daytime (6am-12mn)**

|  | **Baseline**  **(Last 13 weeks of Preceding RCT)** | | **13-week Follow-up** | | | |
| --- | --- | --- | --- | --- | --- | --- |
|  | **CLC**  **N=54** | **PLGS**  **N=55** | **CLC**  **N=54** | **PLGS**  **N=55** | **Risk-Adjusted**  **Difference**  **(95% CI)** | **P-value** |
| **Hours of Sensor Data**  *median (IQR)* | 1592 (1555, 1603) | 1574 (1538, 1595) | 1538 (1472, 1618) | 1515 (1457, 1579) | NA | NA |
| **Overall Control** | | | | | | |
| **% in Target 70-180** mg/dL *mean ± SD* | 69.5% ± 12.2% | 68.5% ± 13.8% | 66.5% ± 13.5% | 60.8% ± 17.3% | +4.7% (+2.4%, +6.9%) | <0.001 |
| **% in Target 70-140** mg/dL *mean ± SD* | 43.4% ± 12.9% | 43.2% ± 12.5% | 41.3% ± 13.5% | 37.1% ± 14.4% | +3.9% (+1.7%, +6.2%) | 0.0062 |
| **Mean Glucose** mg/dL  *mean ± SD* | 158 ± 19 | 160 ± 24 | 162 ± 22 | 170 ± 30 | -6 (-10, -2) | 0.0022 |
| **Standard Deviation** mg/dL  *mean ± SD* | 53± 11 | 55 ± 13 | 55 ± 12 | 60 ± 15 | -2 (-4, 0) | 0.03 |
| **Coefficient of Variation**  *mean ± SD* | 33% ± 4% | 34% ± 5% | 34% ± 5% | 35% ± 5% | 0 (0, 0) | 0.62 |
| **Hypoglycemia** | | | | | | |
| **% Below 54 mg/dL**  *median (IQR)* | 0.14% (0.04%, 0.30%) | 0.21% (0.05%, 0.42%) | 0.18% (0.05%, 0.39%) | 0.18% (0.07%, 0.46%) |  | 0.73 |
| *mean ± SD* | 0.19% ± 0.18% | 0.30% ± 0.38% | 0.26% ± 0.24% | 0.31% ± 0.33% | +0.01% (-0.07%, +0.09%) |  |
| **% Below 60 mg/dL**  *median (IQR)*  *mean ± SD* | 0.35% (0.17%, 0.66%)  0.45% ± 0.37% | 0.44% (0.13%, 0.90%)  0.60% ± 0.66% | 0.42% (0.17%, 0.92%)  0.59% ± 0.51% | 0.42% (0.16%, 1.02%)  0.65% ± 0.59% | +0.06% (-0.07%, +0.2%) | 0.36 |
| **% Below 70 mg/dL**  *median (IQR)*  *mean ± SD* | 1.16% (0.76%, 1.83%)  1.39% 0.97% | 1.41% (0.67%, 2.40%)  1.63% ± 1.31% | 1.41% (0.57%, 2.69%)  1.78% ± 1.36% | 1.57% (0.67%, 2.73%)  1.84% ± 1.40% | +0.17% (-0.13%, +0.47%) | 0.26 |
| **Low Blood Glucose Index**  *median (IQR)* | 0.41 (0.29, 0.60) | 0.44 (0.29, 0.70) | 0.47 (0.25, 0.80) | 0.49 (0.32, 0.92) | 0 (-0.07, +0.07) | 0.99 |
| *mean ± SD* | 0.46 ± 0.27 | 0.51 ± 0.31 | 0.54 ± 0.34 | 0.59 ± 0.36 |  |  |
| **Hypoglycemic Event Rate per Week***  *median (IQR)* | 2.9 (1.7, 4.2) | 3.2 (1.4, 5.1) | 2.9 (1.4, 5.5) | 3.6 (1.8, 5.2) | +0.2 (-0.3, +0.7) | 0.49 |
| *mean ± SD* | 3.2 ± 2.1 | 3.6 ± 2.7 | 3.7 ± 2.5 | 3.9 ± 2.8 |  |  |
| **Hyperglycemia** | | | | | | |
| **% Above 180 mg/dL**  *median (IQR)* | 29% (22%, 38%) | 29% (18%, 38%) | 33% (21%, 40%) | 37% (23%, 51%) | -5% (-7%, -3%) | <0.001 |
| *mean ± SD* | 29% ± 12% | 30% ± 14% | 32% ± 14% | 37% ± 18% |  |  |
| **% Above 250 mg/dL**  *median (IQR)*  *mean ± SD* | 5.4% (2.6%, 9.9%)  7.3% ± 6.1% | 5.5% (2.6%, 10.7%)  8.7% ± 9.6% | 7.4% (3.1%, 11.9%)  8.8% ± 7.8% | 9.2% (3.7%, 16.2%)  12.6% ± 12.5% | -2.0% (-3.4%, -0.5%) | 0.01 |
| **% Above 300 mg/dL**  *median (IQR)* | 1.3% (0.4%, 3.3%) | 1.3% (0.5%, 3.6%) | 1.7% (0.4%, 3.7%) | 1.9% (0.7%, 5.9%) | -0.7% (-1.7%, +0.2) | 0.14 |
| *mean ± SD* | 2.3% ± 2.6% | 3.3% ± 5.4% | 3.0% ± 3.9% | 5.1% ± 7.5% |  |  |
| **High Blood Glucose Index**  *median (IQR)* | 6.4 (4.6, 8.3) | 6.1 (4.1, 8.4) | 7.3 (4.7, 9.0) | 7.4 (5.1, 11.3) | -1.1 (-1.7, -0.4) | 0.001 |
| *mean ± SD* | 6.6 ± 2.9 | 7.1 ± 4.2 | 7.2 ± 3.6 | 8.9 ± 5.4 |  |  |

*At least 15 consecutive minutes <70 mg/dL

**Supplemental Table S1B: CGM-Measured Outcomes during Nighttime (12mn – 6am)**

|  | **Baseline**  **(Last 13 weeks of Preceding RCT)** | | **13-week Follow-up** | | | |
| --- | --- | --- | --- | --- | --- | --- |
|  | **CLC**  **N=54** | **PLGS**  **N=55** | **CLC**  **N=54** | **PLGS**  **N=55** | **Risk-Adjusted**  **Difference**  **(95% CI)** | **P-value** |
| **Hours of Sensor Data**  *median (IQR)* | 534 (524, 540) | 536 (524, 542) | 512 (495, 544) | 514 (486, 532) | NA | NA |
| **Overall Control** | | | | | | |
| **% in Target 70-180** mg/dL *mean ± SD* | 76.0% ± 11.6% | 74.4% ± 15.5% | 70.8% ± 12.4% | 59.3% ± 18.6% | +10.1% (+6.5%, +13.6%) | <0.001 |
| **% in Target 70-140** mg/dL *mean ± SD* | 49.6% ± 12.4% | 49.5% ± 16.5% | 44.1% ± 12.5% | 37.1% ± 16.2% | +7.1% (+3.7%, +10.5%) | <0.001 |
| **Mean Glucose** mg/dL  *mean ± SD* | 151 ±17 | 153 ± 23 | 157 ± 19 | 171 ± 31 | -12 (-17, -7) | <0.001 |
| **Standard Deviation** mg/dL  *mean ± SD* | 47± 12 | 50 ± 15 | 52 ± 12 | 60 ± 15 | -6 (-9, -3) | <0.001 |
| **Coefficient of Variation**  *mean ± SD* | 31% ± 6% | 32% ± 6% | 33% ± 5% | 35% ± 6% | -2% (-3%, 0%) | 0.06 |
| **Hypoglycemia** | | | | | | |
| **% Below 54 mg/dL**  *median (IQR)* | 0.15% (0.03%, 0.33%) | 0.17% (0.02%, 0.38%) | 0.19% (0.05%, 0.53%) | 0.21% (0.03%, 0.51%) |  | 0.22 |
| *mean ± SD* | 0.25% ± 0.30% | 0.30% ± 0.41% | 0.37% ± 0.57% | 0.29% ± 0.33% | +0.10% (-0.06%, +0.27%) |  |
| **% Below 60 mg/dL**  *median (IQR)*  *mean ± SD* | 0.29% (0.12%, 0.57%)  0.45% ± 0.47% | 0.33% (0.08%, 0.79%)  0.57% ± 0.69% | 0.39% (0.12%, 0.88%)  0.68% ± 0.97% | 0.38% (0.18%, 0.91%)  0.62% ± 0.64% | +0.12% (-0.16%, +0.41%) | 0.39 |
| **% Below 70 mg/dL**  *median (IQR)*  *mean ± SD* | 0.94% (0.44%, 1.74%)  1.22% ± 0.97% | 1.02% (0.39%, 2.19%)  1.39% ± 1.37% | 1.28% (0.56%, 2.42%)  1.67% ± 1.62% | 1.38% (0.48%, 2.77%)  1.83% ± 1.73% | -0.02% (-0.56%, +0.51%) | 0.93 |
| **Low Blood Glucose Index**  *median (IQR)* | 0.35 (0.22, 0.58) | 0.37 (0.25, 0.66) | 0.42 (0.22, 0.70) | 0.47 (0.27, 0.89) |  | 0.51 |
| *mean ± SD* | 0.42 ±0.29 | 0.47 ± 0.33 | 0.52 ± 0.40 | 0.60 ± 0.46 | -0.05 (-0.17, +0.09) |  |
| **Hypoglycemic Event Rate per Week***  *median (IQR)* | 1.6 (0.9, 3.1) | 2.0 (0.6, 3.8) | 2.3 (1.1, 4.3) | 2.5 (1.2, 4.6) |  | 0.47 |
| *mean ± SD* | 2.2 ± 1.6 | 2.4 ± 2.1 | 2.6 ± 1.7 | 3.0 ± 2.3 | -0.2 (-0.8, +0.4) |  |
| **Hyperglycemia** | | | | | | |
| **% Above 180 mg/dL**  *median (IQR)* | 22% (15%, 29%) | 20% (11%, 36%) | 27% (20%, 33%) | 38% (23%, 54%) | -10% (-14%, -6%) | <0.001 |
| *mean ± SD* | 23% ± 12% | 24% ± 16% | 28% ± 13% | 39% ± 19% |  |  |
| **% Above 250 mg/dL**  *median (IQR)*  *mean ± SD* | 3.1% (1.3%, 6.8%)  5.0% ± 5.4% | 3.1% (1.2%, 9.6%)  6.8% ± 7.8% | 5.7% (2.2%, 8.9%)  7.0% ± 6.5% | 9.7% (4.0%, 21.5%)  13.6% ± 12.4% | -4.3% (-6.4%, -2.2%) | <0.001 |
| **% Above 300 mg/dL**  *median (IQR)* | 0.7% (0.1%, 2.1%) | 0.7% (0.1%, 3.2%) | 1.3% (0.2%, 2.9%) | 2.5% (0.9%, 8.3%) | -1.6% (-2.7%, -0.5%) | 0.0047 |
| *mean ± SD* | 1.6% ± 2.3% | 2.5% ± 4.0% | 2.3% ± 3.4% | 5.2% ± 6.3% |  |  |
| **High Blood Glucose Index**  *median (IQR)* | 4.8 (3.7, 6.2) | 4.9 (2.6, 8.3) | 6.1 (4.0, 7.5) | 8.1 (5.1, 13.0) | -2.2 (-3.1, -1.3) | <0.001 |
| *mean ± SD* | 5.2 ± 2.7 | 5.8 ± 3.9 | 6.4 ± 3.1 | 9.2 ± 5.3 |  |  |

*At least 15 consecutive minutes <70 mg/dL

# Supplemental Table S2: Subgroup Analysis for Outcomes of CGM-Measured Percent Time in Range 70-180 mg/dL

|  | **% Time in Range 70-180 mg/dL** | | |
| --- | --- | --- | --- |
| **Baseline Factors** | **CLC Group**  *(N)*  *Baseline/*  *Post Randomization* | **PLGS Group**  *(N)*  *Baseline/*  *Post Randomization* | **P-value for interaction** |
| **Overall** | (54) 71.1%/ 67.6% | (55) 70.0%/60.4% |  |
| **HbA1c** |  |  | <0.001 |
| ≤7.5% (≤58 mmol/mol) | (39) 75.3%/72.3% | (43) 74.8%/65.3% |  |
| >7.5% (>58 mmol/mol) | (15) 60.2%/55.5% | (12) 52.7%/42.7% |  |
| **% Time Below 70mg/dL** |  |  | <0.001 |
| ≤1% | (24) 68.4%/64.3% | (21) 69.4%/58.6% |  |
| >1% | (30) 73.3%/70.3% | (34) 70.3%/61.5% |  |
| **% Above 180 mg/dL** |  |  | <0.001 |
| ≤40% | (46) 74.1%/70.6% | (44) 75.0%/65.7% |  |
| >40% | (8) 53.8%/50.5% | (11) 50.0%/39.0% |  |
| **% in Range 70-180 mg/dL** |  |  | <0.001 |
| ≤60% | (9) 54.4%/51.5% | (12) 50.7%/39.4% |  |
| >60% | (45) 74.5%/70.8% | (43) 75.4%/66.3% |  |
| **Age** |  |  | 0.20 |
| 14-24 years | (17) 63.6%/59.6% | (22) 62.1%/51.6% |  |
| 25-71 years | (37) 74.6%/71.3% | (33) 75.2%/66.2% |  |
| **Gender** |  |  | 0.76 |
| Female | (28) 72.9%/68.3% | (25) 71.5%/61.4% |  |
| Male | (26) 69.2%/66.8% | (30) 68.7%/59.6% |  |
| **Race (White)a** |  |  | 0.02 |
| No | (7) 63.7%/57.5% | (7) 71.8%/60.4% |  |
| Yes | (46) 72.2%/69.2% | (46) 70.1%/61.2% |  |
| **BMI** |  |  | 0.58 |
| ≤25 | (22) 70.0%/66.5% | (26) 68.3%/58.3% |  |
| >25 | (32) 71.9%/68.4% | (29) 71.5%/62.3% |  |
| **Incomeb** |  |  | >0.99 |
| <$100,000 | (13) 73.4%/68.8% | (18) 72.0%/60.1% |  |
| ≥$100,000 | (29) 71.4%/68.4% | (26) 66.7%/57.2% |  |
| **Educationc** |  |  | 0.54 |
| ≤ Bachelor’s Degree | (34) 72.7%/69.9% | (31) 69.1%/59.0% |  |
| ≥ Master’s Degree | (19) 69.5%/64.7% | (24) 71.2%/62.2% |  |
| **Insuranced** |  |  | 0.87 |
| Private | (49) 70.9%/67.7% | (51) 70.2%/60.9% |  |
| Other | (2) 73.6%/63.2% | (3) 62.7%/46.0% |  |
| None | (2) 75.4%/68.4% | 0 |  |
| **Hypoglycemia Awareness Score** |  |  | 0.29 |
| ≤1 | (27) 72.7%/70.8% | (33) 66.2%/56.5% |  |
| >1 | (27) 69.5%/64.4% | (22) 75.6%/66.3% |  |
| **Hypoglycemia Fear**  **Total Score** |  |  | 0.10 |
| <Median | (22) 72.7%/68.4% | (32) 70.4%/62.5% |  |
| ≥Median | (32) 70.0%/67.1% | (23) 69.4%/57.5% |  |
| **Site** |  |  | 0.49 |
| A | (8) 75.1%/72.0% | (7) 63.6%/52.7% |  |
| B | (8) 71.0%/66.5% | (8) 65.8%/55.5% |  |
| C | (8) 71.8%/68.3% | (7) 76.2%/67.0% |  |
| D | (7) 73.7%/70.5% | (8) 80.8%/71.4% |  |
| E | (7) 66.6%/64.0% | (9) 72.8%/65.0% |  |
| F | (8) 66.2%/63.6% | (8) 57.0%/48.3% |  |
| G | (8) 73.1%/68.2% | (8) 73.2%/62.2% |  |

aOne patient in the CLC-CLC group and two in the CLC-PLGS group did not provide race information.

bTwelve patients in the CLC-CLC group and 11 in the CLC-PLGS group did not provide income information.

cHighest level completed by patient, or by primary caregiver if patient <18 years old. One patient in the CLC-CLC group did not provide education information.

dOne patient in the CLC-CLC group and one in the CLC-PLGS group did not provide insurance information.

# Supplemental Table S3: HbA1c Results

|  | **CLC**  **N=54** | **PLGS**  **N=55** | **Difference**  **(95% CI)** | **P-value** |
| --- | --- | --- | --- | --- |
| **HbA1c at Start of Preceding RCT: % (mmol/mol)**  *mean±SD* | 7.48% ± 1.10%  (58 ± 12) | 7.35% ± 0.83%  (57 ± 9.1) |  |  |
| **HbA1c at Start of This Study (Baseline): % (mmol/mol)**  *mean±SD* | 7.05% ± 0.78%  (54 ± 8.5) | 7.06% ± 0.77%  (54 ± 8.4) |  |  |
| **HbA1c at 13 Weeks: % (mmol/mol)**  *mean±SD* | 7.18% ± 0.80%  (55 ± 8.7) | 7.53% ± 1.14%  (59 ± 12.5) | -0.34% (-0.57%, -0.11%)  [-3.7 (-6.2, -1.2] | 0.0035 |
| **HbA1c <7.0% (<53 mmol/mol) at 13 Weeks** *n (%)* | 23 (43%) | 15 (27%) | 13% (-6%, 32%) | 0.05 |
| **HbA1c <7.5% (<58 mmol/mol) at 13 Weeks** *n (%)* | 35 (65%) | 32 (58%) | 9% (-14%, 31%) | 0.20 |
| **HbA1c Improvement by >0.5% (>5.5 mmol/mol) from Baseline to 13 Weeks** *n (%)* | 1 (2%) | 2 (4%) |  |  |
| **HbA1c Improvement by >1.0% (10.9 mmol/mol) from Baseline to 13 Weeks** *n (%)* | 0 | 0 |  |  |
| **HbA1c Relative Improvement by >10% (>86 mmol/mol) from Baseline to 13 Weeks** *n (%)* | 0 | 0 |  |  |
| **HbA1c Improvement by >1.0% (>10.9 mmol/mol) from Baseline to 13 Weeks or HbA1c <7.0% (<53 mmol/mol) at 13 Weeks** *n (%)* | 23 (43%) | 15 (27%) | 13% (-6%, 32%) | 0.05 |

# Supplemental Table S4: Insulin, Weight, and Body Mass Index

|  | **Start of This Study (Baseline)** | | **At 13-week Follow-up** | | | |
| --- | --- | --- | --- | --- | --- | --- |
|  | **CLC**  **N=54** | **PLGS**  **N=55** | **CLC**  **N=54** | **PLGS**  **N=55** | **Difference**  **(95% CI)** | **P-value** |
| **Total Daily Insulin (per Kg)**  *median (IQR)* | N = 54  0.59 (0.49, 0.86) | N = 54  0.68 (0.46, 0.93) | N = 53  0.62 (0.50, 0.84) | N = 55  0.67 (0.48, 0.88) | -0.02 (-0.05, 0.01) | 0.25 |
| **Basal: Bolus Ratio**  *median (IQR)* | N = 54  0.9 (0.7, 1.2) | N = 54  0.8 (0.6, 1.2) | N = 53  1.0 (0.8, 1.2) | N = 55  0.9 (0.6, 1.3) | +0.10 (-0.06, +0.25) | 0.21 |
| **Weight (kg)**  *median (IQR)* | N = 54  77.2 (66.3, 93.4) | N = 55  73.0 (65.5, 87.8) | N = 54  79.2 (65.9, 93.4) | N = 55  72.8 (65.8, 87.8) | +0.3 (-0.4, +1.1) | 0.39 |
| **Body Mass Index (kg per m2)**  *median (IQR)* | N = 54  25.7 (23.4, 30.0) | N = 55  25.1 (22.6, 28.5) | N = 54  25.6 (23.3, 29.2) | N = 55  25.1 (23.1, 28.1) | +0.1 (-0.2, +0.3) | 0.48 |

# Supplemental Table S5: Safety Outcomes

|  | **13-week Follow-up** | |
| --- | --- | --- |
|  | **CLC**  **N=54** | **PLGS**  **N=55** |
| **All Adverse Events** *- count* | 0 | 3 |
| **Severe Hypoglycemia Events** *- n(%) of participants [# of events)* | 0 | 0 |
| **Diabetic Ketoacidosis Events***- n(%) of participants [# of events)* | 0 | 0 |
| **Serious Adverse Events Related to Study Device** *n(%) of participants [# of events)* | 0 | 0 |
| **Other Serious Adverse Events**-*n(%) of participants [# of events)* | 0 | 0 |
| **Hyperglycemia/Ketosis Events without DKA -***n(%) of participants [# of events)* | 0 | 3 |
| **Glycated Hemoglobin Worsening by >0.5% (>5.5 mmol/mol) -***n (%) of participants* | 8 (15%) | 20 (36%) |
| **CGM-Measured Hypoglycemic Eventd Rate per Week**  *median (IQR)* | 0.4 (0.1, 0.9) | 0.5 (0.1, 0.9) |
| **CGM-Measured Hyperglycemic Evente Rate per Week**  *median (IQR)* | 1.6 (0.5, 3.1) | 2.3 (0.9, 5.3) |
| **Days with At Least One Ketone Measurement >1.0 mmol/L** *n (% of days)* | 5 (0.10%) | 1 (0.02%) |
